# Supplementary material for: An Adaptive Threshold in Mammalian Neocortical Evolution
Source: PLoS Biol. 2014 Nov 18;12(11):e1002000. doi: 10.1371/journal.pbio.1002000 (PMC4236020; doi:10.1371/journal.pbio.1002000)
Supplement: Table S6 — Parameters for neuroepithelial founder pool population estimates in mouse and human. (XLSX) [file pbio.1002000.s018.xlsx]

## Sheet: Sheet1
Table S6: Parameters for neuroepithelial founder pool population estimates in mouse and human
Sample	Average_length_dorsal telencephalon_(µm)	Length_of_the_ventricle_(µm)	Surface_of_dorsal_telencephalon(µm^2)	Average_diameter_of_the_endfoot(µm)
Mouse_E11.5	1196.96	807.203	942164	1.788
Human_GW9	9752.8	8288	79023000	1.701
